# Supplementary figures and images for: Inflammation-induced anorexia and fever are elicited by distinct prostaglandin dependent mechanisms, whereas conditioned taste aversion is prostaglandin independent
Source: PubMed Central journal article supplement — Brain Behav Immun. 2017 Mar;61:236–43. doi: 10.1016/j.bbi.2016.12.007 (PMC5325121; doi:10.1016/j.bbi.2016.12.007), 2017-03

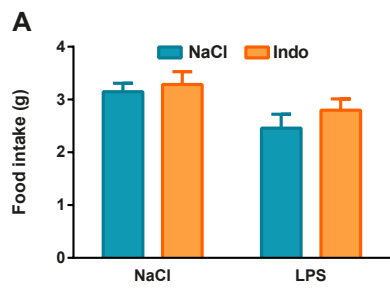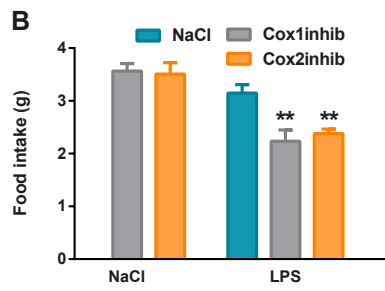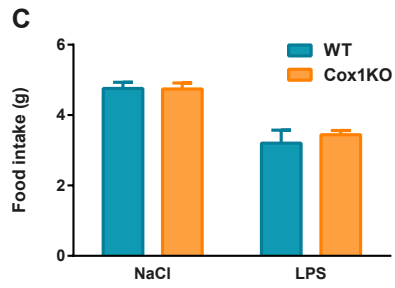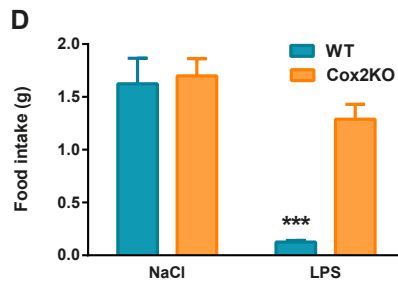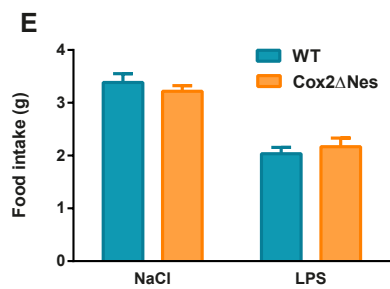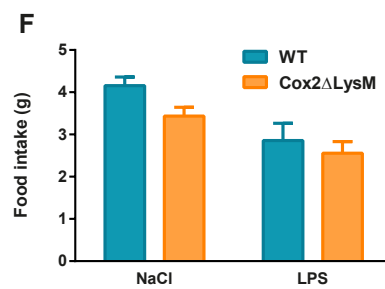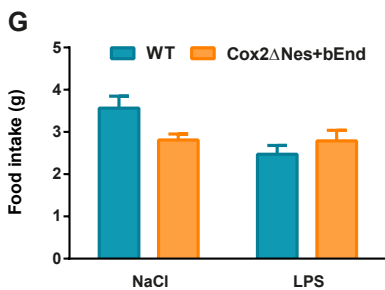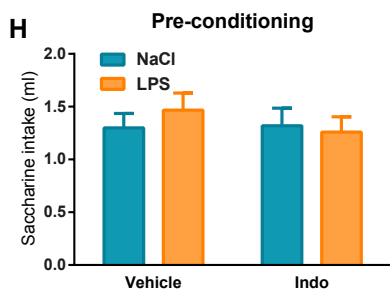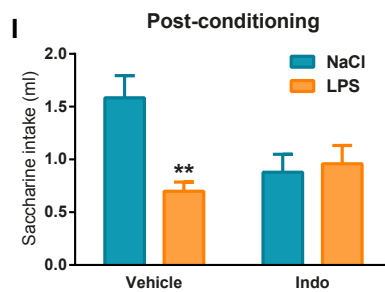

Supplement: mmc1.pdf [file mmc1.pdf]
